# Supplementary material
Source: publisher figshare collection journal article supplement (https://frontiersin.figshare.com/ndownloader/files/31879946)

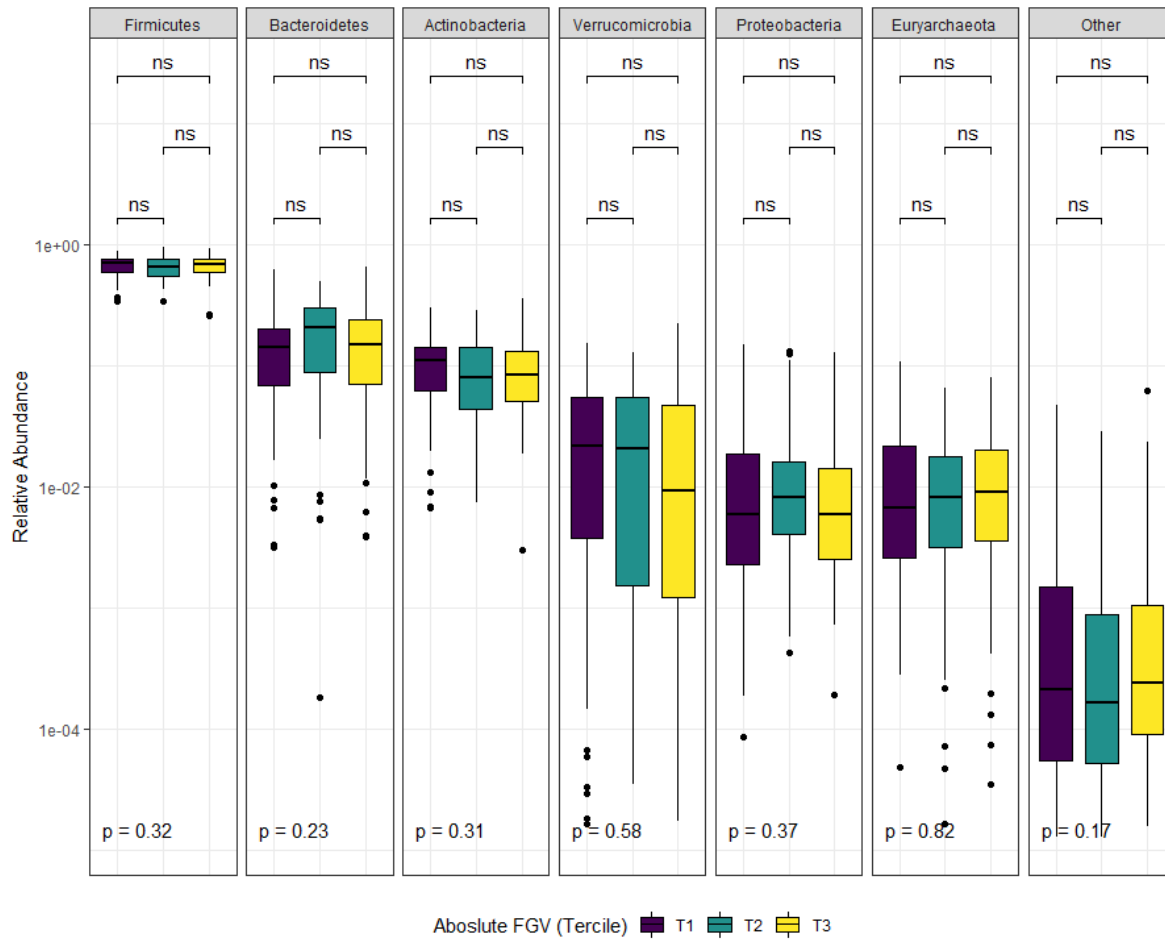

Supplement: Supplementary file [file 31879946]
